# Supplementary material for: Emerging Roles of Endocannabinoids as Key Lipid Mediators for a Successful Pregnancy
Source: MDPI journal article supplement (doi:10.3390/ijms24065220), 2023-03-09
Supplement: s1 [file s1]

Table S1. A summary of the main findings concerning the physiological role of the ECS in the early pregnancy processes (as discussed in paragraph 4).

| <i>Oviductal transport</i>    | <i>Species</i>                   | <i>Tissue, cells</i>    | <i>Main findings</i>                                                                                                             | <i>Ref.</i> |
|-------------------------------|----------------------------------|-------------------------|----------------------------------------------------------------------------------------------------------------------------------|-------------|
|                               | <i>Mus musculus</i> (C57BL/6J)   | oviduct, uterus, embryo | FAAH deficiency increases oviductal embryo retention by CB1-dependent signaling                                                  | [1]         |
|                               | <i>Mus musculus</i> (C57BL/6J)   | oviduct, uterus, embryo | CB1 deficiency and Meth-AEA increase oviductal embryo retention by CB1-dependent signaling                                       | [2]         |
|                               | <i>Mus musculus</i> (C57BL/6J)   | oviduct, uterus, embryo | CB1/adrenergic signaling dysregulations increase oviductal embryo retention                                                      | [2]         |
|                               | <i>Mus musculus</i> (C57BL/6J)   | oviduct, uterus, embryo | $\Delta$ 9-THC, but not CBD or CBN, increases oviductal embryo retention by CB1-dependent signaling                              | [1]         |
| <i>Blastocyst development</i> | <i>Species</i>                   | <i>Tissue, cells</i>    | <i>Main findings</i>                                                                                                             | <i>Ref.</i> |
|                               | <i>Mus musculus</i> (C57BL/6J)   | oviduct, uterus, embryo | FAAH deficiency impairs embryo development by CB1-dependent signaling                                                            | [1]         |
|                               | <i>Mus musculus</i> (129/C57Bl6) | oviduct, uterus, embryo | CB1 and FAAH deficiency impairs embryo development                                                                               | [3]         |
|                               | <i>Mus musculus</i> (CD-1)       | oviduct, uterus, embryo | CB1, CB2 and CB1/CB2 deficiency impairs embryo development                                                                       | [4]         |
|                               | <i>Mus musculus</i> (C57BL/6)    | uterus, embryo          | CB1/CB2 deficiency does not affect embryo development                                                                            | [5]         |
|                               | <i>Mus Musculus</i> (CD-1)       | embryo culture          | AEA and 2-AG inhibit the synchronous embryo development by CB1-dependent signaling.                                              | [6]         |
|                               | <i>Mus musculus</i> (C57BL/6J)   | oviduct, uterus, embryo | $\Delta$ 9-THC, but not CBD or CBN, impairs embryo transition to blastocyst by CB1-dependent signaling                           | [1]         |
|                               | <i>Mus Musculus</i> (CD-1)       | embryo culture          | AEA, $\Delta$ 9-THC, WIN55-212, CP 55,940, but not AA and CBD, impair embryo transition to blastocyst in a dose-dependent manner | [7]         |
| <i>Implantation</i>           | <i>Species</i>                   | <i>Tissue, cells</i>    | <i>Main findings</i>                                                                                                             | <i>Ref.</i> |
|                               | <i>Mus musculus</i> (CD-1)       | uterus                  | AEA level is lower in receptive than non-receptive uteri                                                                         | [4]         |
|                               | <i>Mus musculus</i> (129/C57Bl6) | uterus                  | AEA and 2-AG levels are lower in IS than inter-IS                                                                                | [8]         |
|                               | <i>Mus musculus</i> (CD-1)       | uterus                  | AEA level is lower in IS than inter-IS                                                                                           | [9]         |
|                               | <i>Mus musculus</i> (CD-1)       | uterus                  | NAPE-PLD activity is lower, while FAAH activity is higher, in IS than inter-IS                                                   | [10]        |
|                               | <i>Mus Musculus</i> (CD-1)       | uterus                  | NAPE-PLD activity and AEA levels are lower in IS than inter-IS and regulated by sex steroid hormones and blastocyst state.       | [11]        |
|                               | <i>Mus musculus</i> (CD-1)       | embryo culture          | AEA reduces blastocyst hatching by CB1-signaling                                                                                 | [9]         |
|                               | <i>Mus musculus</i> (C57BL/6J)   | uterus, embryo          | FAAH deficiency impairs blastocyst implantation by CB1-dependent signaling                                                       | [1]         |
|                               | <i>Mus musculus</i> (C57BL/6J)   | uterus                  | CB1/CB2 deficiency impairs luminal epithelial organization and increases edema in the PDZ                                        | [5]         |
|                               | <i>Mus musculus</i> (CD-1)       | embryo culture          | CB1 is higher in dormant than activated blastocysts                                                                              | [4]         |

|                        |                                             |                                                          |                                                                                                                                                                                                           |             |
|------------------------|---------------------------------------------|----------------------------------------------------------|-----------------------------------------------------------------------------------------------------------------------------------------------------------------------------------------------------------|-------------|
|                        | <i>Mus musculus</i>                         | embryo culture                                           | CB1 is higher in dormant than activated blastocysts                                                                                                                                                       | [12]        |
|                        | <i>Mus musculus</i>                         | embryo culture                                           | AEA regulates blastocyst competency by differently modulating MAPK signaling and Ca <sup>2+</sup> channel activity trough CB1-dependent mechanisms.                                                       | [12]        |
|                        | <i>Mus musculus</i> (129/C57Bl6)            | embryo, TSC culture                                      | CB1 and FAAH deficiency affects cell migration-related genes in blastocysts and cell mobility in TSCs.                                                                                                    | [3]         |
|                        | <i>Mus musculus</i> (CD-1)                  | uterus, embryo                                           | $\Delta$ 9-THC impairs blastocyst implantation by CB1/CB2-dependent signaling                                                                                                                             | [4]         |
|                        | <i>Mus musculus</i> (C57BL/6J)              | uterus, embryo                                           | $\Delta$ 9-THC, but not CBD or CBN, impairs blastocyst implantation by CB1-dependent signaling                                                                                                            | [1]         |
|                        | <i>Mus Musculus</i> (CD-1)                  | uterus                                                   | $\Delta$ 9-THC impairs blastocyst implantation by CB1-dependent signaling                                                                                                                                 | [6]         |
|                        | <i>Mus musculus</i> (CD-1)                  | uterus, embryo                                           | CP 55,940 inhibits blastocyst implantation by CB1-dependent signaling                                                                                                                                     | [9]         |
| <i>Decidualization</i> | <i>Species</i>                              | <i>Tissue, cells</i>                                     | <i>Main findings</i>                                                                                                                                                                                      | <i>Ref.</i> |
|                        | <i>Homo sapiens</i>                         | St-T1b cells and primary HdF cells                       | AEA impairs human ESC proliferation and differentiation, but not viability, by CB1-dependent signaling                                                                                                    | [13]        |
|                        | <i>Homo sapiens</i>                         | St-T1b cells and primary HdF cells                       | AEA impairs decidualization and reduces COX-2 level and PGE2 production by CB1-dependent signaling                                                                                                        | [14]        |
|                        | <i>Homo sapiens</i>                         | St-T1b cells                                             | AEA induces apoptosis, ROS production, loss of $\Delta\Psi$ m, ER stress and reduces cell viability and proliferation partly by induction of COX-2 activity                                               | [15]        |
|                        | <i>Homo sapiens</i>                         | placental microsomes, St-T1b cells and primary HdF cells | AEA shows anti-aromatase activity and regulates aromatase expression and E2 secretion partly by CB1-dependent signaling                                                                                   | [16]        |
|                        | <i>Homo sapiens</i>                         | ESC cells, BeWo cells, HTR8-SV/neo cells                 | $\Delta$ 9-THC, CBD, CBN impair ESC decidualization, trophoblast-endometrium interaction and invasion                                                                                                     | [17]        |
|                        | <i>Homo sapiens</i>                         | placental microsomes, St-T1b cells and primary HdF cells | CBD, but not $\Delta$ 9-THC, shows anti-aromatase activity and impairs decidualization in ESCs                                                                                                            | [18]        |
|                        | <i>Homo sapiens</i>                         | primary ESC and HdF cells                                | WIN55,212 inhibits decidual fibroblasts and ESC decidualization. WIN55,212 induces apoptosis and reduces intracellular cAMP levels                                                                        | [19]        |
|                        | <i>Homo sapiens</i>                         | St-T1b cells and primary HdF cells                       | WIN55,212, JWH-122 and UR-144 induce ROS/RNS production and ER stress. WIN55,212 reduces cell viability and proliferation, induces apoptosis and loss of $\Delta\Psi$ m partly by CB1-dependent signaling | [20]        |
|                        | <i>Homo sapiens, Mus musculus</i> (C57BL/6) | uterus, primary mESCs, HdF                               | CB1/CB2 deficiency impairs decidualization, vascular remodeling and formation of avascular PDZ. CB1 deficiency impairs decidualization in mESCs and HdF.                                                  | [21]        |
|                        | <i>Rattus norvegicus</i> (Wistar)           | primary decidual cells                                   | AEA induces apoptosis, loss of $\Delta\Psi$ m and ROS production by induction of COX-2 activity                                                                                                           | [22]        |
|                        | <i>Rattus norvegicus</i> (Wistar)           | primary decidual cells                                   | AEA reduces cell viability and induces apoptosis in decidual cells by CB1-dependent signaling                                                                                                             | [23]        |
|                        | <i>Rattus norvegicus</i> (Wistar)           | primary decidual cells                                   | AEA induces ROS production, loss of $\Delta\Psi$ m, and apoptosis in decidual cells by ceramide synthesis                                                                                                 | [24]        |
|                        | <i>Rattus norvegicus</i> (Wistar)           | primary rat ESC; in vivo deciduoma model                 | AEA reduces cell viability and impairs differentiation of primary ESCs. AEA impairs decidualization and downregulates $\alpha$ 2-MG, COX-2 and VEGF expression <i>in vivo</i>                             | [25]        |
|                        | <i>Rattus norvegicus</i>                    | primary decidual cells                                   | 2-AG reduces cell viability and induces apoptosis in decidual cells by CB1-dependent signaling                                                                                                            | [26]        |

| (Wistar)     |                     |                                                 |                                                                                                                                                                                                                                                                                                                                                                  |      |
|--------------|---------------------|-------------------------------------------------|------------------------------------------------------------------------------------------------------------------------------------------------------------------------------------------------------------------------------------------------------------------------------------------------------------------------------------------------------------------|------|
| Placentation | Species             | Tissue, cells                                   | Main findings                                                                                                                                                                                                                                                                                                                                                    | Ref. |
|              | <i>Homo sapiens</i> | BeWo cells                                      | 2-AG induces apoptosis, loss of $\Delta\Psi_m$ , ROS/RNS production and reduces proliferation in BeWo cells by CB1 and/or CB2-dependent signaling.                                                                                                                                                                                                               | [27] |
|              | <i>Homo sapiens</i> | hCTs, BeWo cells                                | 2-AG induces apoptosis, ROS/RNS production and ER stress partly by CB2-dependent signaling                                                                                                                                                                                                                                                                       | [28] |
|              | <i>Homo sapiens</i> | hCTs                                            | 2-AG impairs cAMP/PKA, p38 and ERK1/2 signaling, endocrine functions and placental protein expression, but not cell viability, in syncytiotrophoblasts by CB1 and/or CB2-dependent signaling                                                                                                                                                                     | [29] |
|              | <i>Homo sapiens</i> | hCTs                                            | AEA induces apoptosis, loss of $\Delta\Psi_m$ , ROS/RNS production, and intracellular $Ca^{2+}$ level increase in hCTs by TRPV1-dependent mechanisms.                                                                                                                                                                                                            | [30] |
|              | <i>Homo sapiens</i> | BeWo cells                                      | Meth-AEA impairs the syncytialization in Fsk-treated BeWo cells                                                                                                                                                                                                                                                                                                  | [31] |
|              | <i>Homo sapiens</i> | hCTs, BeWo cells                                | AEA reduces cell viability in hCTs and BeWo cells. AEA induces apoptosis, loss of $\Delta\Psi_m$ and ROS/RNS production in BeWo cells by CB1 and/or CB2-dependent signaling                                                                                                                                                                                      | [32] |
|              | <i>Homo sapiens</i> | HTR8-SV/neo cells                               | AEA and 2-AG modulate angiogenic factors partly via CB receptors. AEA and 2-AG promote HTR8-SV/neo tube formation, and 2-AG increase HTR8-SV/neo cells migration                                                                                                                                                                                                 | [33] |
|              | <i>Homo sapiens</i> | BeWo cells                                      | JWH-018, JWH-122, UR-144 and $\Delta^9$ -THC affect cell viability and cell proliferation. JWH-018, UR-144, JWH-122 induce ROS/RNS production; $\Delta^9$ -THC, UR-144, JWH-122 induce loss of $\Delta\Psi_m$ . The effects on apoptosis are mediated by CB1 and/or CB2 dependent (for JWH-018, UR-144, $\Delta^9$ -THC) or independent mechanisms (for JWH-122) | [34] |
|              | <i>Homo sapiens</i> | hCTs, BeWo cells                                | WIN55,212 reduces cell viability in hCTs and cell viability and proliferation in BeWo cells. WIN55,212 reduces $\Delta\Psi_m$ and increases apoptosis by CB1-dependent mechanisms in BeWo cells.                                                                                                                                                                 | [35] |
|              | <i>Homo sapiens</i> | BeWo cells                                      | $\Delta^9$ -THC impairs syncytialization and biochemical differentiation, endocrine secretion, mitochondrial dynamics partly by CB1 and CB2-dependent signaling. $\Delta^9$ -THC increases stress responses, intracellular defenses, ROS production and reduces $\Delta\Psi_m$ and oxygen consumption                                                            | [36] |
|              | <i>Homo sapiens</i> | HTR8-SV/neo cells                               | $\Delta^9$ -THC impairs trophoblast invasive capacity and mitochondrial dynamics through CB1 and/or CB2 receptors. $\Delta^9$ -THC increases ROS production and stress responses, and decreases mitochondrial respiration and $\Delta\Psi_m$ .                                                                                                                   | [37] |
|              | <i>Homo sapiens</i> | BeWo cells                                      | $\Delta^9$ -THC induces ER stress through CB1 and CB2 receptors. $\Delta^9$ -THC reduces mitochondrial respiration and ATP-coupling efficiency.                                                                                                                                                                                                                  | [38] |
|              | <i>Homo sapiens</i> | chorionic villous explants cultures, BeWo cells | $\Delta^9$ -THC upregulates aromatase and ER $\alpha$ expression by CB1 and CB2-dependent signaling                                                                                                                                                                                                                                                              | [39] |
|              | <i>Homo sapiens</i> | BeWo cells                                      | $\Delta^9$ -THC reduces GLU1 and GR expression in BeWo cells.                                                                                                                                                                                                                                                                                                    | [40] |
|              | <i>Homo sapiens</i> | placenta, HUVECs                                | <i>Cannabis</i> exposure leads to placenta vascular defects. $\Delta^9$ -THC reduces HUVEC proliferation, migration, tube formation capacity. $\Delta^9$ -THC inhibits RhoA/MLC signaling pathway affecting cell migration and tube formation.                                                                                                                   | [41] |
|              | <i>Homo sapiens</i> | BeWo cells, HTR8-SV/neo cells                   | CBD reduces cell viability, proliferation, $\Delta\Psi_m$ , and increases apoptosis in BeWo cells and HTR8-SV/neo cells. No effects on ROS/RNS production. CBD increases autophagy by HIF1 $\alpha$ and impairs migration in HTR8-SV/neo cells.                                                                                                                  | [42] |
|              | <i>Homo sapiens</i> | placenta, hCTs                                  | hCTs express CNR1 and show higher levels of 2-AG than AEA. CB1 is involved in hCT invasion                                                                                                                                                                                                                                                                       | [43] |

|                                           |                           |                                                                                                                                                                                                                                                                                                                                   |      |
|-------------------------------------------|---------------------------|-----------------------------------------------------------------------------------------------------------------------------------------------------------------------------------------------------------------------------------------------------------------------------------------------------------------------------------|------|
| <i>Homo sapiens</i>                       | BeWo cells                | AEA and $\Delta^9$ -THC modulate FA uptake in time, dose and pH-dependent manner. The acute modulatory effects of AEA and $\Delta^9$ -THC are not mediated by CB1 or CB2-dependent signaling                                                                                                                                      | [44] |
| <i>Homo sapiens</i>                       | placenta, BeWo cells      | AEA downregulates syncytialization-related genes and BCRP transporter expression by CB2/cAMP signaling. AEA is not a substrate or inhibitor of BCRP in BeWo cells.                                                                                                                                                                | [45] |
| <i>Homo sapiens</i>                       | placenta, BeWo cells      | CBD inhibits the BCRP efflux activity both in BeWo cells and perfused placentas as <i>ex vivo</i> models. CBD does not affect placental tissues viability.                                                                                                                                                                        | [46] |
| <i>Macaca mulatta</i><br>(rhesus macaque) | placenta                  | $\Delta^9$ -THC reduces the amniotic fluid volume, maternal perfusion of the IVS and fetal oxygen availability. $\Delta^9$ -THC alters histology and gene expression profile in placenta, with DEGs enrichment in cytokine binding, regulation of cell migration, cell-substrate adhesion, angiogenesis, and vascular development | [47] |
| <i>Rattus norvegicus</i><br>(Wistar)      | placenta                  | $\Delta^9$ -THC exposure results in symmetrical IUGR, increased placental weights, and reduced fetal:placental weight ratio. $\Delta^9$ -THC exposure results in an increased labyrinth layer areas, maternal/fetal blood space ratio and number of pericytes. $\Delta^9$ -THC reduces GLU1 and GR expression.                    | [40] |
| <i>Mus musculus</i><br>(C57BL/6)          | placenta                  | $\Delta^9$ -THC attenuates placental angiogenesis by inhibiting RhoA/MLC signaling pathway                                                                                                                                                                                                                                        | [41] |
| <i>Mus musculus</i><br>(C57BL/6)          | uterus, TS cells          | PCP signaling in cooperation with CB1 receptors regulates trophoblast migration in placentation                                                                                                                                                                                                                                   | [48] |
| <i>Mus musculus</i><br>(C57BL/6j)         | oviduct, uterus, placenta | CB1 deficient mice show compromised placentation, reduced fetal trophoblast proliferation and invasiveness                                                                                                                                                                                                                        | [49] |

**Abbreviations:** 2-AG, 2-arachidonoylglycerol; AEA, anandamide; BCRP, Breast cancer resistance protein; cAMP/PKA, cyclic Adenosine monophosphate/protein kinase A; CB, G protein-coupled cannabinoid receptors; CBD, cannabidiol; CBN, Cannabinol; COX-2, Cyclooxygenase-2; DEG, differentially expressed genes; E2, estradiol; ECS, endocannabinoid system; ER, endoplasmic reticulum; ER $\alpha$ , estrogen receptor  $\alpha$ ; ESC, endometrial stromal cells; FA, acid folic; FAAH, fatty acid amide hydrolase; Fsk, forskolin; GLU1, glucose transporter 1; GR, glucocorticoid receptors; hCTs, human cytotrophoblast cells; HdFs, human decidual fibroblasts; HIF1 $\alpha$ , hypoxia-inducible factor; hTS, human trophoblast cells; HUVECs, human vein endothelial cells; IS, implantation sites; IUGR, intrauterine growth restriction; IVS, intervillous space; MAPK, mitogen-activated protein kinase; Meth-AEA, methanandamide; NAPE-PLD; N-acylphosphatidylethanolamine specific phospholipase d-like; PCP, planar cell polarity; PDZ, primary decidua zone; PGE, prostaglandin E; RhoA/MLC, Ras homolog family member A/myosin light chain; ROS/RNS, reactive oxygen species/reactive nitrogen species; St-T1b, human immortalized endometrial stromal cell line; TRPV1, transient receptor potential vanilloid 1; TSC, trophoblast stem cells; VEGF, vascular endothelial growth factor;  $\alpha$ 2-M,  $\alpha$ 2-macroglobulin;  $\Delta^9$ -THC,  $\Delta^9$ -tetrahydrocannabinol;  $\Delta\Psi$ m, mitochondrial membrane potential.

## References

- Wang, H.; Xie, H.; Guo, Y.; Zhang, H.; Takahashi, T.; Kingsley, P. J.; Marnett, L. J.; Das, S. K.; Cravatt, B. F.; Dey, S. K., Fatty acid amide hydrolase deficiency limits early pregnancy events. *J Clin Invest* **2006**, 116, (8), 2122-31.
- Wang, H.; Guo, Y.; Wang, D.; Kingsley, P. J.; Marnett, L. J.; Das, S. K.; DuBois, R. N.; Dey, S. K., Aberrant cannabinoid signaling impairs oviductal transport of embryos. *Nat Med* **2004**, 10, (10), 1074-80.
- Xie, H.; Sun, X.; Piao, Y.; Jegga, A. G.; Handwerker, S.; Ko, M. S.; Dey, S. K., Silencing or amplification of endocannabinoid signaling in blastocysts via CB1 compromises trophoblast cell migration. *The Journal of biological chemistry* **2012**, 287, (38), 32288-97.
- Paria, B. C.; Song, H.; Wang, X.; Schmid, P. C.; Krebsbach, R. J.; Schmid, H. H.; Bonner, T. I.; Zimmer, A.; Dey, S. K., Dysregulated cannabinoid signaling disrupts uterine receptivity for embryo implantation. *J Biol Chem* **2001**, 276, (23), 20523-8.
- Li, Y.; Bian, F.; Sun, X.; Dey, S. K., Mice Missing Cnr1 and Cnr2 Show Implantation Defects. *Endocrinology* **2019**, 160, (4), 938-946.
- Paria, B. C.; Ma, W.; Andrenyak, D. M.; Schmid, P. C.; Schmid, H. H.; Moody, D. E.; Deng, H.; Makriyannis, A.; Dey, S. K., Effects of cannabinoids on preimplantation mouse embryo development and implantation are mediated by brain-type cannabinoid receptors. *Biology of reproduction* **1998**, 58, (6), 1490-5.
- Paria, B. C.; Das, S. K.; Dey, S. K., The preimplantation mouse embryo is a target for cannabinoid ligand-receptor signaling. *Proceedings of the National Academy of Sciences of the United States of America* **1995**, 92, (21), 9460-4.
- Wang, H.; Xie, H.; Sun, X.; Kingsley, P. J.; Marnett, L. J.; Cravatt, B. F.; Dey, S. K., Differential regulation of endocannabinoid synthesis and degradation in the uterus during embryo implantation. *Prostaglandins Other Lipid Mediat* **2007**, 83, (1-2), 62-74.
- Schmid, P. C.; Paria, B. C.; Krebsbach, R. J.; Schmid, H. H.; Dey, S. K., Changes in anandamide levels in mouse uterus are associated with uterine receptivity for embryo implantation. *Proceedings of the National Academy of Sciences of the United States of America* **1997**, 94, (8), 4188-92.
- Paria, B. C.; Deutsch, D. D.; Dey, S. K., The uterus is a potential site for anandamide synthesis and hydrolysis: differential profiles of anandamide synthase and hydrolase activities in the mouse uterus during the periimplantation period. *Mol Reprod Dev* **1996**, 45, (2), 183-92.

11. Guo, Y.; Wang, H.; Okamoto, Y.; Ueda, N.; Kingsley, P. J.; Marnett, L. J.; Schmid, H. H.; Das, S. K.; Dey, S. K., N-acylphosphatidylethanolamine-hydrolyzing phospholipase D is an important determinant of uterine anandamide levels during implantation. *J Biol Chem* **2005**, *280*, (25), 23429-32.
12. Wang, H.; Matsumoto, H.; Guo, Y.; Paria, B. C.; Roberts, R. L.; Dey, S. K., Differential G protein-coupled cannabinoid receptor signaling by anandamide directs blastocyst activation for implantation. *Proceedings of the National Academy of Sciences of the United States of America* **2003**, *100*, (25), 14914-9.
13. Almada, M.; Amaral, C.; Diniz-da-Costa, M.; Correia-da-Silva, G.; Teixeira, N. A.; Fonseca, B. M., The endocannabinoid anandamide impairs in vitro decidualization of human cells. *Reproduction* **2016**, *152*, (4), 351-61.
14. Almada, M.; Cunha, S.; Fonseca, B. M.; Amaral, C.; Piscitelli, F.; Di Marzo, V.; Correia-da-Silva, G.; Teixeira, N., Anandamide interferes with human endometrial stromal-derived cell differentiation: An effect dependent on inhibition of cyclooxygenase-2 expression and prostaglandin E2 release. *Biofactors* **2016**, *42*, (3), 277-86.
15. Almada, M.; Fonseca, B. M.; Amaral, C.; Diniz-da-Costa, M.; Correia-da-Silva, G.; Teixeira, N., Anandamide oxidative metabolism-induced endoplasmic reticulum stress and apoptosis. *Apoptosis : an international journal on programmed cell death* **2017**, *22*, (6), 816-826.
16. Almada, M.; Oliveira, A.; Amaral, C.; Fernandes, P. A.; Ramos, M. J.; Fonseca, B.; Correia-da-Silva, G.; Teixeira, N., Anandamide targets aromatase: A breakthrough on human decidualization. *Biochim Biophys Acta Mol Cell Biol Lipids* **2019**, *1864*, (12), 158512.
17. Neradugomma, N. K.; Drafton, K.; Mor, G. G.; Mao, Q., Marijuana-derived cannabinoids inhibit uterine endometrial stromal cell decidualization and compromise trophoblast-endometrium cross-talk. *Reprod Toxicol* **2019**, *87*, 100-107.
18. Almada, M.; Amaral, C.; Oliveira, A.; Fernandes, P. A.; Ramos, M. J.; Fonseca, B. M.; Correia-da-Silva, G.; Teixeira, N., Cannabidiol (CBD) but not tetrahydrocannabinol (THC) dysregulate in vitro decidualization of human endometrial stromal cells by disruption of estrogen signaling. *Reprod Toxicol* **2020**, *93*, 75-82.
19. Moghadam, K. K.; Kessler, C. A.; Schroeder, J. K.; Buckley, A. R.; Brar, A. K.; Handwerger, S., Cannabinoid receptor I activation markedly inhibits human decidualization. *Mol Cell Endocrinol* **2005**, *229*, (1-2), 65-74.
20. Fonseca, B. M.; Fernandes, R.; Almada, M.; Santos, M.; Carvalho, F.; Teixeira, N. A.; Correia-da-Silva, G., Synthetic cannabinoids and endometrial stromal cell fate: Dissimilar effects of JWH-122, UR-144 and WIN55,212-2. *Toxicology* **2019**, *413*, 40-47.
21. Li, Y.; Dewar, A.; Kim, Y. S.; Dey, S. K.; Sun, X., Pregnancy success in mice requires appropriate cannabinoid receptor signaling for primary decidua formation. *Elife* **2020**, *9*.
22. Almada, M.; Piscitelli, F.; Fonseca, B. M.; Di Marzo, V.; Correia-da-Silva, G.; Teixeira, N., Anandamide and decidual remodelling: COX-2 oxidative metabolism as a key regulator. *Biochim Biophys Acta* **2015**, *1851*, (11), 1473-81.
23. Fonseca, B. M.; Correia-da-Silva, G.; Teixeira, N. A., Anandamide-induced cell death: dual effects in primary rat decidual cell cultures. *Placenta* **2009**, *30*, (8), 686-92.
24. Fonseca, B. M.; Correia-da-Silva, G.; Teixeira, N. A., The endocannabinoid anandamide induces apoptosis of rat decidual cells through a mechanism involving ceramide synthesis and p38 MAPK activation. *Apoptosis* **2013**, *18*, (12), 1526-35.
25. Fonseca, B. M.; Correia-da-Silva, G.; Teixeira, N. A., Anandamide restricts uterine stromal differentiation and is critical for complete decidualization. *Mol Cell Endocrinol* **2015**, *411*, 167-76.
26. Fonseca, B. M.; Correia-da-Silva, G.; Taylor, A. H.; Lam, P. M.; Marczylo, T. H.; Bell, S. C.; Konje, J. C.; Teixeira, N. A., The endocannabinoid 2-arachidonoylglycerol (2-AG) and metabolizing enzymes during rat fetoplacental development: a role in uterine remodelling. *The international journal of biochemistry & cell biology* **2010**, *42*, (11), 1884-92.
27. Costa, M. A.; Fonseca, B. M.; Keating, E.; Teixeira, N. A.; Correia-da-Silva, G., 2-arachidonoylglycerol effects in cytotrophoblasts: metabolic enzymes expression and apoptosis in BeWo cells. *Reproduction* **2014**, *147*, (3), 301-11.
28. Almada, M.; Costa, L.; Fonseca, B.; Alves, P.; Braga, J.; Goncalves, D.; Teixeira, N.; Correia-da-Silva, G., The endocannabinoid 2-arachidonoylglycerol promotes endoplasmic reticulum stress in placental cells. *Reproduction* **2020**, *160*, (2), 171-180.
29. Costa, M. A.; Fonseca, B. M.; Mendes, A.; Braga, J.; Teixeira, N. A.; Correia-da-Silva, G., The endocannabinoid 2-arachidonoylglycerol dysregulates the synthesis of proteins by the human syncytiotrophoblast. *Biochim Biophys Acta* **2016**, *1861*, (3), 205-12.
30. Costa, M. A.; Fonseca, B. M.; Keating, E.; Teixeira, N. A.; Correia-da-Silva, G., Transient receptor potential vanilloid 1 is expressed in human cytotrophoblasts: induction of cell apoptosis and impairment of syncytialization. *The international journal of biochemistry & cell biology* **2014**, *57*, 177-85.
31. Etcheverry, T.; Accialini, P.; Palligas, M.; Loureiro, F.; Saraco, N.; Martinez, N.; Farina, M., Endocannabinoid signaling impairs syncytialization: Using flow cytometry to evaluate forskolin-induced cell fusion. *Placenta* **2021**, *103*, 152-155.
32. Costa, M. A.; Fonseca, B. M.; Teixeira, N. A.; Correia-da-Silva, G., The endocannabinoid anandamide induces apoptosis in cytotrophoblast cells: involvement of both mitochondrial and death receptor pathways. *Placenta* **2015**, *36*, (1), 69-76.
33. Maia, J.; Fonseca, B. M.; Teixeira, N.; Correia-da-Silva, G., The endocannabinoids anandamide and 2-arachidonoylglycerol modulate the expression of angiogenic factors on HTR8/SVneo placental cells. *Prostaglandins Leukot Essent Fatty Acids* **2022**, *180*, 102440.
34. Almada, M.; Alves, P.; Fonseca, B. M.; Carvalho, F.; Queiros, C. R.; Gaspar, H.; Amaral, C.; Teixeira, N. A.; Correia-da-Silva, G., Synthetic cannabinoids JWH-018, JWH-122, UR-144 and the phytocannabinoid THC activate apoptosis in placental cells. *Toxicol Lett* **2020**, *319*, 129-137.
35. Almada, M.; Costa, L.; Fonseca, B. M.; Amaral, C.; Teixeira, N.; Correia-da-Silva, G., The synthetic cannabinoid WIN-55,212 induced-apoptosis in cytotrophoblasts cells by a mechanism dependent on CB1 receptor. *Toxicology* **2017**, *385*, 67-73.
36. Walker, O. S.; Ragos, R.; Gurm, H.; Lapierre, M.; May, L. L.; Raha, S., Delta-9-tetrahydrocannabinol disrupts mitochondrial function and attenuates syncytialization in human placental BeWo cells. *Physiol Rep* **2020**, *8*, (13), e14476.
37. Walker, O. S.; Gurm, H.; Sharma, R.; Verma, N.; May, L. L.; Raha, S., Delta-9-tetrahydrocannabinol inhibits invasion of HTR8/SVneo human extravillous trophoblast cells and negatively impacts mitochondrial function. *Sci Rep* **2021**, *11*, (1), 4029.

38. Lojpur, T.; Easton, Z.; Raez-Villanueva, S.; Laviolette, S.; Holloway, A. C.; Hardy, D. B., Delta9-Tetrahydrocannabinol leads to endoplasmic reticulum stress and mitochondrial dysfunction in human BeWo trophoblasts. *Reprod Toxicol* **2019**, 87, 21-31.
39. Maia, J.; Almada, M.; Mídao, L.; Fonseca, B. M.; Braga, J.; Goncalves, D.; Teixeira, N.; Correia-da-Silva, G., The Cannabinoid Delta-9-tetrahydrocannabinol Disrupts Estrogen Signaling in Human Placenta. *Toxicol Sci* **2020**, 177, (2), 420-430.
40. Natale, B. V.; Gustin, K. N.; Lee, K.; Holloway, A. C.; Laviolette, S. R.; Natale, D. R. C.; Hardy, D. B., Delta9-tetrahydrocannabinol exposure during rat pregnancy leads to symmetrical fetal growth restriction and labyrinth-specific vascular defects in the placenta. *Sci Rep* **2020**, 10, (1), 544.
41. Chang, X.; Li, H.; Li, Y.; He, Q.; Yao, J.; Duan, T.; Wang, K., RhoA/MLC signaling pathway is involved in Delta(9)-tetrahydrocannabinol-impaired placental angiogenesis. *Toxicol Lett* **2018**, 285, 148-155.
42. Alves, P.; Amaral, C.; Teixeira, N.; Correia-da-Silva, G., Cannabidiol disrupts apoptosis, autophagy and invasion processes of placental trophoblasts. *Arch Toxicol* **2021**, 95, (10), 3393-3406.
43. Gormley, M.; Oliverio, O.; Kapidzic, M.; Ona, K.; Hall, S.; Fisher, S. J., RNA profiling of laser microdissected human trophoblast subtypes at mid-gestation reveals a role for cannabinoid signaling in invasion. *Development* **2021**, 148, (20).
44. Araujo, J. R.; Goncalves, P.; Martel, F., Effect of cannabinoids upon the uptake of folic acid by BeWo cells. *Pharmacology* **2009**, 83, (3), 170-6.
45. Szilagyi, J. T.; Composto-Wahler, G. M.; Joseph, L. B.; Wang, B.; Rosen, T.; Laskin, J. D.; Aleksunes, L. M., Anandamide down-regulates placental transporter expression through CB2 receptor-mediated inhibition of cAMP synthesis. *Pharmacol Res* **2019**, 141, 331-342.
46. Feinshtein, V.; Erez, O.; Ben-Zvi, Z.; Eshkoli, T.; Sheizaf, B.; Sheiner, E.; Holcberg, G., Cannabidiol enhances xenobiotic permeability through the human placental barrier by direct inhibition of breast cancer resistance protein: an ex vivo study. *Am J Obstet Gynecol* **2013**, 209, (6), 573 e1-573 e15.
47. Roberts, V. H. J.; Schabel, M. C.; Boniface, E. R.; D'Mello, R. J.; Morgan, T. K.; Terrobias, J. J. D.; Graham, J. A.; Borgelt, L. M.; Grant, K. A.; Sullivan, E. L.; Lo, J. O., Chronic prenatal delta-9-tetrahydrocannabinol exposure adversely impacts placental function and development in a rhesus macaque model. *Sci Rep* **2022**, 12, (1), 20260.
48. Kim, Y. S.; Li, Y.; Yuan, J.; Borg, J. P.; Sun, X.; Dey, S. K., Cannabinoid and planar cell polarity signaling converges to direct placentation. *Proceedings of the National Academy of Sciences of the United States of America* **2021**, 118, (38).
49. Sun, X.; Xie, H.; Yang, J.; Wang, H.; Bradshaw, H. B.; Dey, S. K., Endocannabinoid signaling directs differentiation of trophoblast cell lineages and placentation. *Proceedings of the National Academy of Sciences of the United States of America* **2010**, 107, (39), 16887-92.
